# Supplementary material
Source: MDPI journal article supplement (https://www.mdpi.com/2072-4292/15/15/3847)
Supplement: s1 [file s1]

# Supplementary Materials: NDVI Analysis for Monitoring Land-cover Evolution on Selected Deglaciaded Areas in the Gran Paradiso Group (Italian Western Alps)

Simona Gennaro <sup>1,†</sup> , Riccardo Cerrato <sup>2,†\*</sup> , Maria Cristina Salvatore <sup>1,2</sup> , Roberto Salzano <sup>3</sup> , Rosamaria Salvatori <sup>4</sup> , and Carlo Baroni <sup>1,2</sup> 

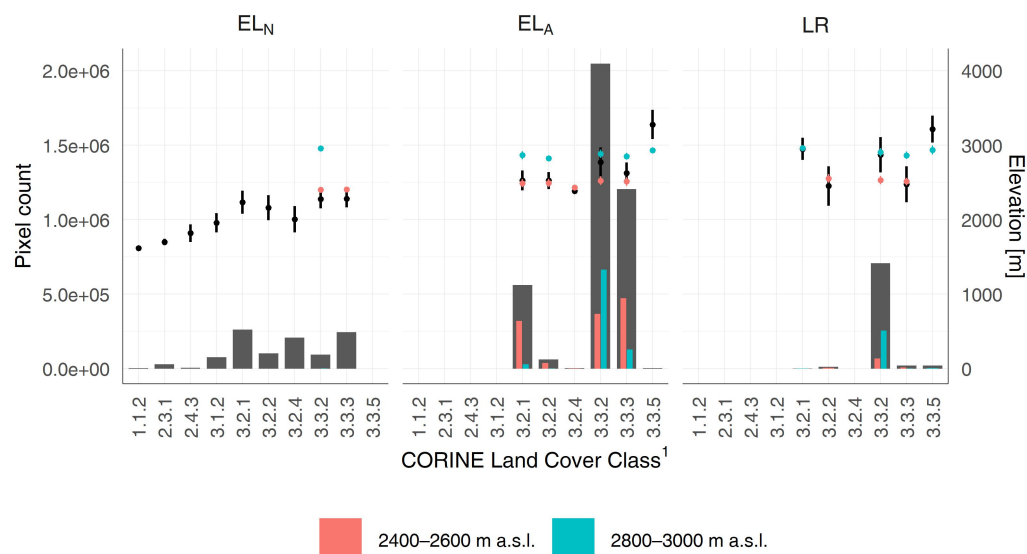

**Figure S1.** Number of analysed pixels grouped by deglaciaded area and CORINE 1990 land cover class. Dark bars identify the total number of pixels; dots identify the median elevation of the pixel groups together with their standard deviation.

<sup>1</sup> CORINE Land Cover class definition: 1.1.2 – Discontinuous urban fabric; 2.3.1 – Pastures; 2.4.3 – Land principally occupied by agriculture with significant areas of natural vegetation; 3.1.2 – Coniferous forest; 3.2.1 – Natural grasslands; 3.2.2 – Moors and heathland; 3.2.4 – Transitional woodland-shrub; 3.3.2 – Bare rocks; 3.3.3 – Sparsely vegetated areas; 3.3.5 – Glaciers and perpetual snow.

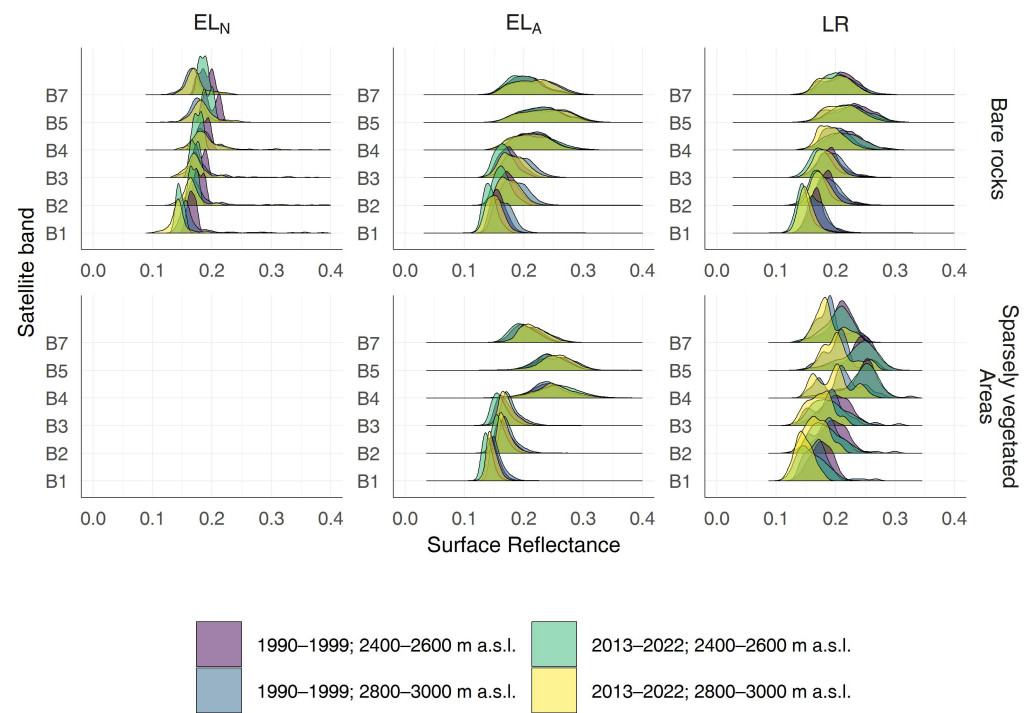

**Figure S2.** Density distribution of surface reflectance values. Bands' names were standardised compliant with the Landsat 4-5 Thematic Mapper definition.

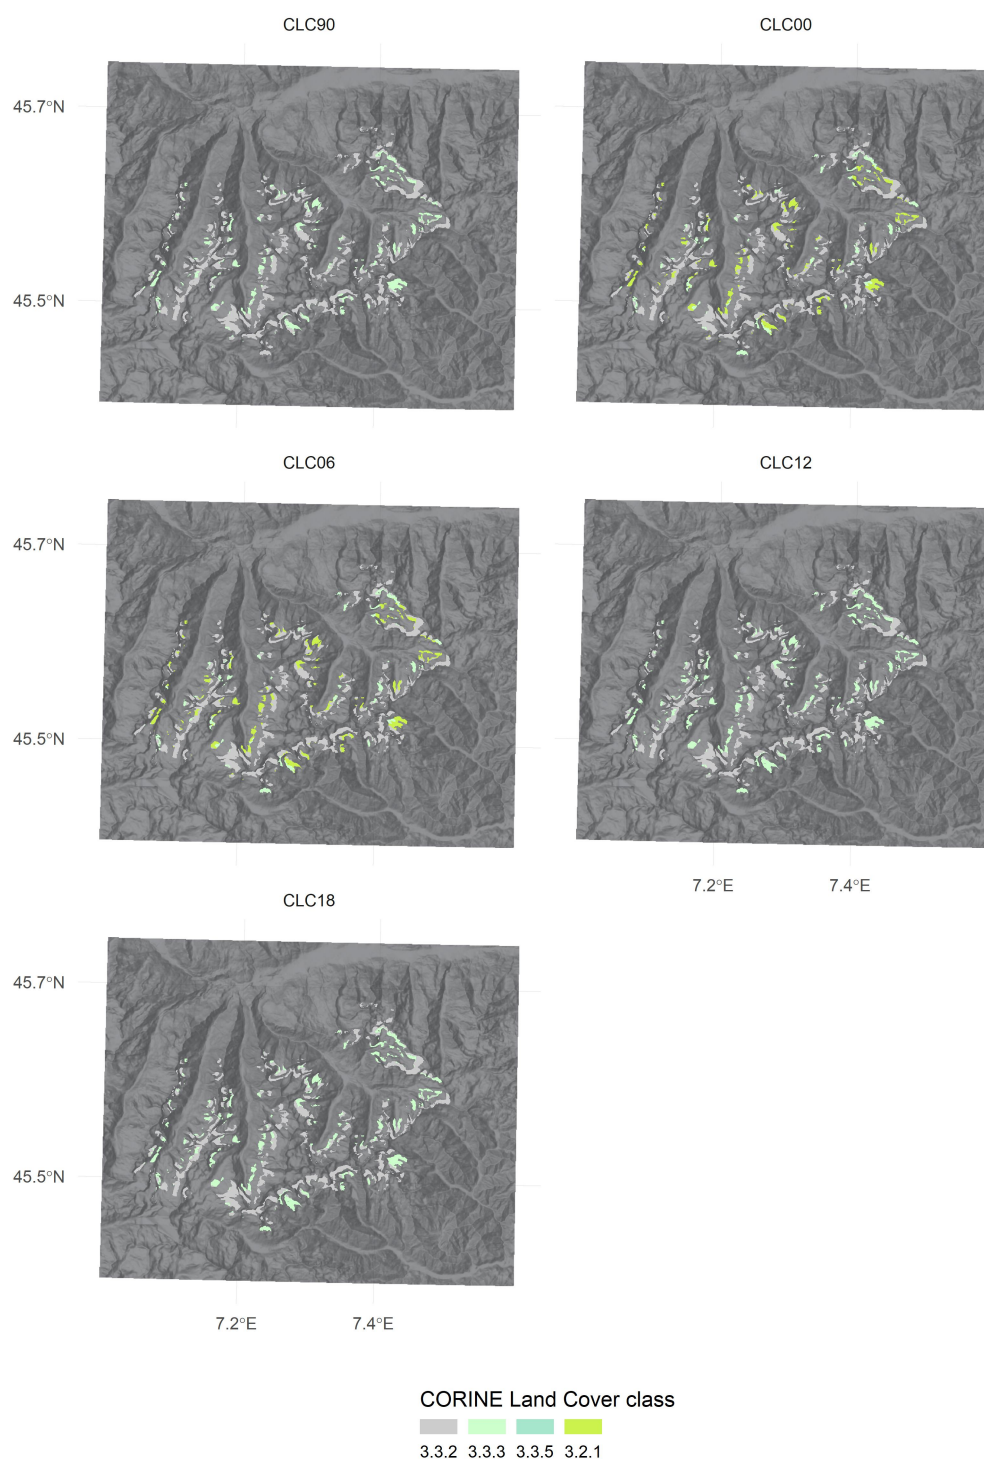

**Figure S3.** Spatial distribution of the CORINE Land Cover classes<sup>1</sup> of the pixels comprised in 2400–2600 and 2800–3000 m a.s.l. elevation belts. Only pixels classified as "bare rocks" and "sparsely vegetated areas" in CLC90 were considered. All CORINE Land Cover published datasets were compared (<https://land.copernicus.eu/pan-european/corine-land-cover>, accessed on 5 July 2023). Basemap: ESRI world hillshade (dark) ([https://services.arcgisonline.com/arcgis/rest/services/Elevation/World\\_Hillshade\\_Dark/MapServer](https://services.arcgisonline.com/arcgis/rest/services/Elevation/World_Hillshade_Dark/MapServer), accessed on 5 July 2023).

<sup>1</sup> CORINE Land Cover class definition: 3.3.2 – Bare rocks; 3.3.3 – Sparsely vegetated areas; 3.3.5 – Glaciers and perpetual snow; 3.2.1 – Natural grasslands.

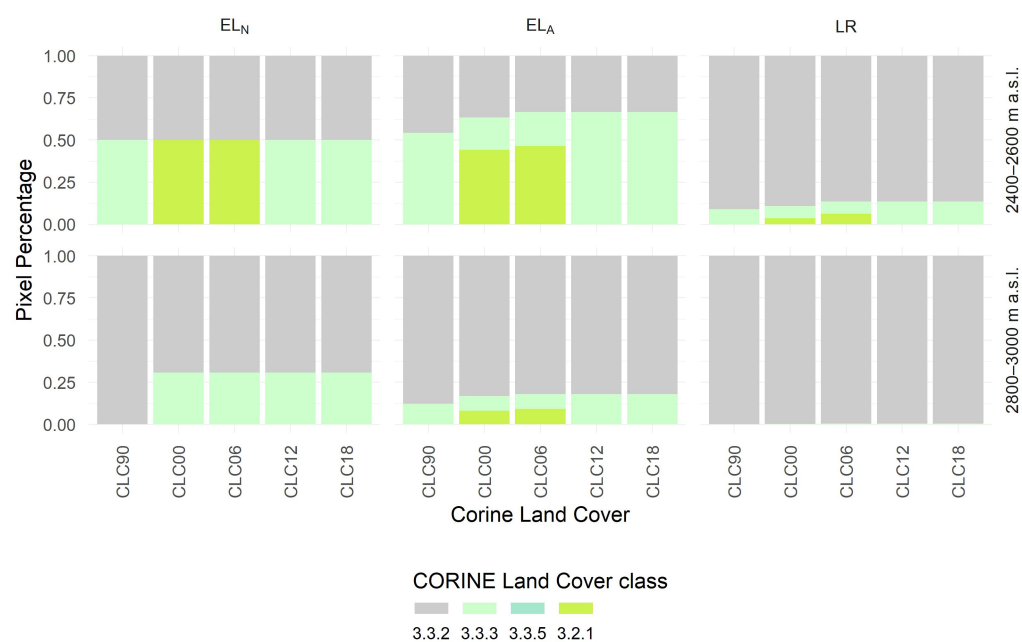

**Figure S4.** Distribution of the CORINE Land Cover classes<sup>1</sup> of the pixels comprised in 2400–2600 and 2800–3000 m a.s.l. elevation belts. Only pixels classified as "bare rocks" and "sparsely vegetated areas" in CLC90 were considered. All CORINE Land Cover published datasets were compared (<https://land.copernicus.eu/pan-european/corine-land-cover>, accessed on 5 July 2023). Basemap: ESRI world hillshade (dark) ([https://services.arcgisonline.com/arcgis/rest/services/Elevation/World\\_Hillshade\\_Dark/MapServer](https://services.arcgisonline.com/arcgis/rest/services/Elevation/World_Hillshade_Dark/MapServer), accessed on 5 July 2023).

<sup>1</sup> CORINE Land Cover class definition: 3.3.2 – Bare rocks; 3.3.3 – Sparsely vegetated areas; 3.3.5 – Glaciers and perpetual snow; 3.2.1 – Natural grasslands.
